# Supplementary material for: Phenotype of Arabidopsis thaliana semi-dwarfs with deep roots and high growth rates under water-limiting conditions is independent of the GA5 loss-of-function alleles
Source: PubMed Central journal article supplement (PMC4549960; doi:10.1093/aob/mcv099), 2015-07-07

## SUPPLEMENTARY DATA

**Table S1. Growth percentage under sorbitol (relative to control) among *A. thaliana* GA biosynthesis mutants in different shoot and root related traits.** Seedlings were grown *in vitro* (1% agar with 1/3 Hoagland solution, evaluated 18 days after germination). Values in parenthesis indicate the propagation of uncertainty (n = 5 – 12 for sorbitol, n = 6 – 12 for control). NA = Not applicable.

| Genotypes                    | LPR            | LLR            | TRL            | RSD            | RSW             | PLA            | RSR             | SFW            | SDW            | SLA             | LDMC            | PLT             |
|------------------------------|----------------|----------------|----------------|----------------|-----------------|----------------|-----------------|----------------|----------------|-----------------|-----------------|-----------------|
| <i>ga5</i>                   | 71.8<br>(5.3)  | 99.1<br>(34.4) | 76.7<br>(9.5)  | 71.8<br>(5.4)  | 112.8<br>(16.1) | 81.8<br>(10.0) | 101.9<br>(12.7) | 69.9<br>(9.4)  | 114.0<br>(9.9) | 70.7<br>(6.5)   | 164.5<br>(21.0) | 118.7<br>(13.3) |
| <i>Ler</i>                   | 72.7<br>(7.6)  | 43.2<br>(24.1) | 65.4<br>(10.6) | 72.8<br>(7.6)  | 62.4<br>(22.9)  | 88.7<br>(26.3) | 61.8<br>(26.7)  | 91.1<br>(32.4) | 73.6<br>(13.5) | 112.5<br>(26.1) | 61.2<br>(30.4)  | 93.2<br>(11.9)  |
| <i>ga1-13</i>                | 92.5<br>(5.3)  | NA<br>NA       | 85.9<br>(6.3)  | 92.5<br>(5.6)  | 91.7<br>(21.1)  | 81.4<br>(12.2) | 118.1<br>(10.1) | 76.8<br>(8.7)  | 86.4<br>(17.8) | 82.5<br>(14.1)  | 114.8<br>(16.2) | 105.6<br>(13.7) |
| <i>ga20ox1-3</i>             | 87.1<br>(10.3) | 5.7<br>(36.0)  | 69.0<br>(14.1) | 87.5<br>(10.1) | 48.8<br>(19.3)  | 68.6<br>(17.3) | 131.8<br>(11.8) | 62.6<br>(13.3) | 88.2<br>(14.1) | 75.9<br>(8.8)   | 151.4<br>(22.7) | 112.8<br>(11.5) |
| <i>ga20ox2-1</i>             | 71.8<br>(5.0)  | NA<br>NA       | 63.8<br>(7.0)  | 71.0<br>(4.9)  | 45.0<br>(16.9)  | 59.3<br>(7.6)  | 107.0<br>(10.5) | 65.9<br>(6.6)  | 73.6<br>(7.0)  | 80.9<br>(12.3)  | 107.6<br>(14.5) | 83.4<br>(13.9)  |
| <i>ga20ox1<br/>ga20ox2</i>   | 77.9<br>(4.1)  | NA<br>NA       | 74.4<br>(4.4)  | 78.0<br>(4.0)  | 59.0<br>(16.8)  | 49.3<br>(10.6) | 187.2<br>(99.5) | 53.7<br>(3.3)  | 64.6<br>(6.7)  | 75.0<br>(11.3)  | 150.1<br>(57.8) | 115.2<br>(41.4) |
| <i>ga3ox1-3</i>              | 77.5<br>(6.4)  | 20.1<br>(25.1) | 70.7<br>(7.8)  | 78.1<br>(6.6)  | 48.6<br>(13.9)  | 67.3<br>(10.7) | 98.3<br>(6.6)   | 80.7<br>(5.7)  | 96.1<br>(8.0)  | 70.6<br>(9.4)   | 120.3<br>(13.2) | 83.2<br>(8.8)   |
| <i>ga3ox1-3<br/>ga3ox2-1</i> | 71.9<br>(4.3)  | NA<br>NA       | 68.0<br>(5.1)  | 71.9<br>(4.2)  | 68.0<br>(18.5)  | 44.1<br>(8.7)  | 109.0<br>(9.7)  | 66.7<br>(5.8)  | 74.3<br>(5.5)  | 60.9<br>(8.6)   | 110.2<br>(8.6)  | 67.1<br>(6.3)   |
| Col                          | 80.5<br>(3.5)  | 8.8<br>(14.0)  | 64.6<br>(4.6)  | 80.6<br>(3.5)  | 39.7<br>(11.4)  | 73.5<br>(6.8)  | 116.5<br>(5.9)  | 70.5<br>(3.9)  | 80.1<br>(4.1)  | 92.9<br>(7.5)   | 114.8<br>(6.4)  | 105.4<br>(6.5)  |

**Fig. S1. Phenotypes of *A. thaliana* GA biosynthesis mutants.** Means ( $\pm$  standard errors,  $n = 4 - 12$ ) of shoot and root traits in different GA biosynthesis mutants and their corresponding wild type controls, grown *in vitro* (1% agar with 1/3 Hoagland solution, evaluated 18 days after germination). All mutants are in Col background except *ga5*, which has the *Ler* background. Different colours indicate near isogenic comparisons. The letters above each panel indicate the results of a *post-hoc* Tukey's HSD test where means with different letters are significantly different ( $P < 0.05$ ).

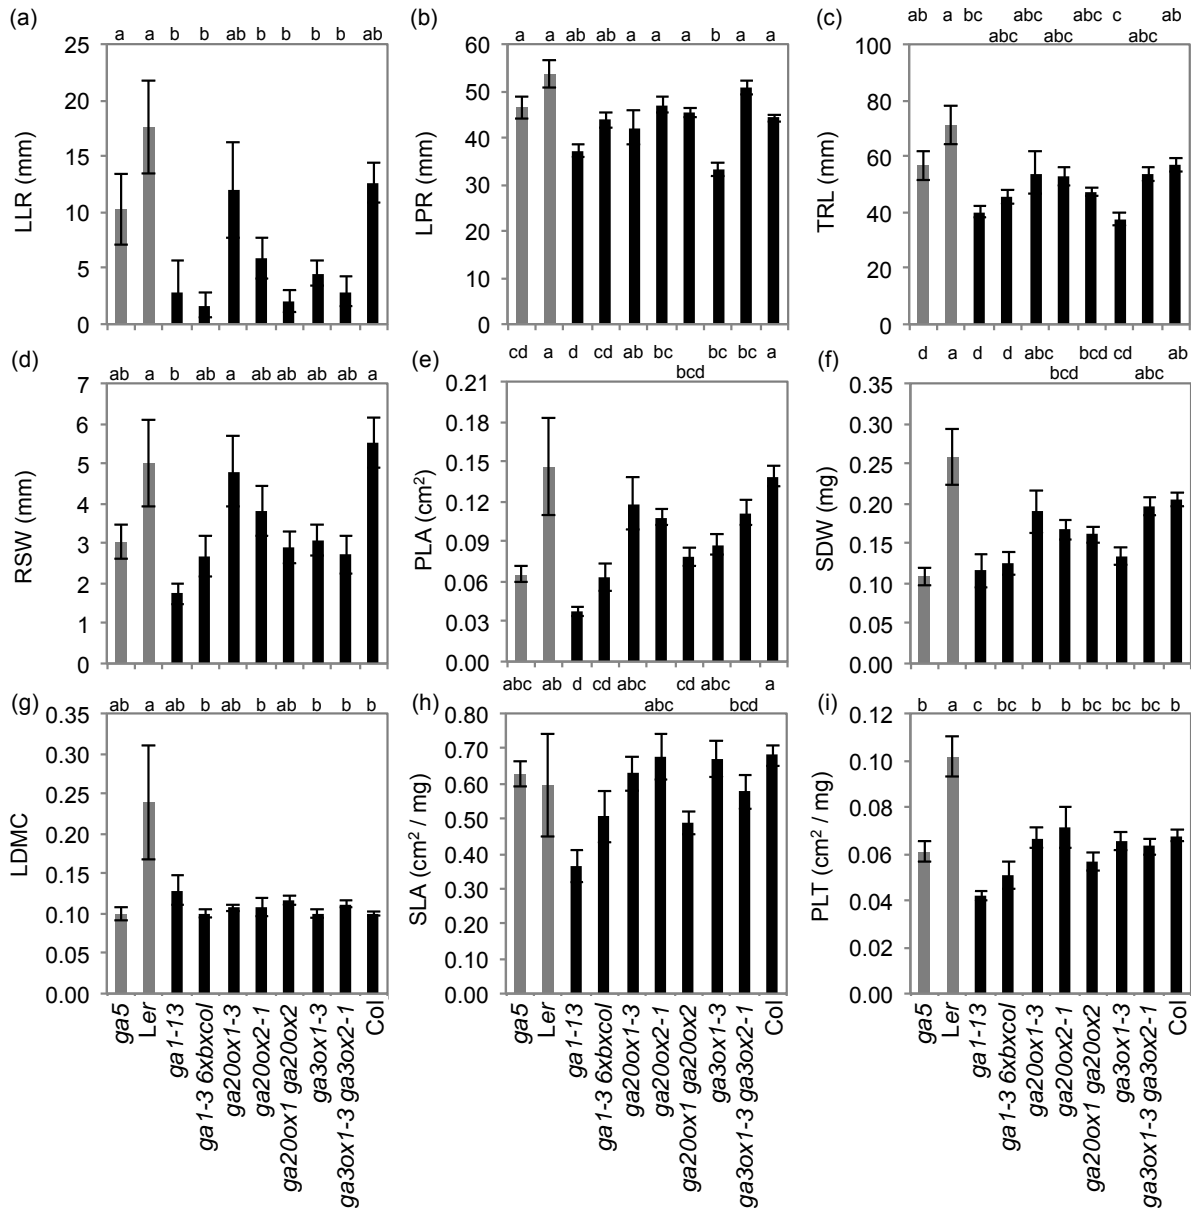

**Fig. S2. Principal Component Analysis (PCA) and correlations for shoot and root related traits.** PCA of GA biosynthesis *A. thaliana* mutants and their corresponding wild type controls, based on the combined data of different shoot and root phenotypes of plants grown *in vitro* (a; 1% agar with 1/3 Hoagland solution). Variables factor map (b) is shown. All mutants are in Col background except for *ga5*, which has *Ler* background.

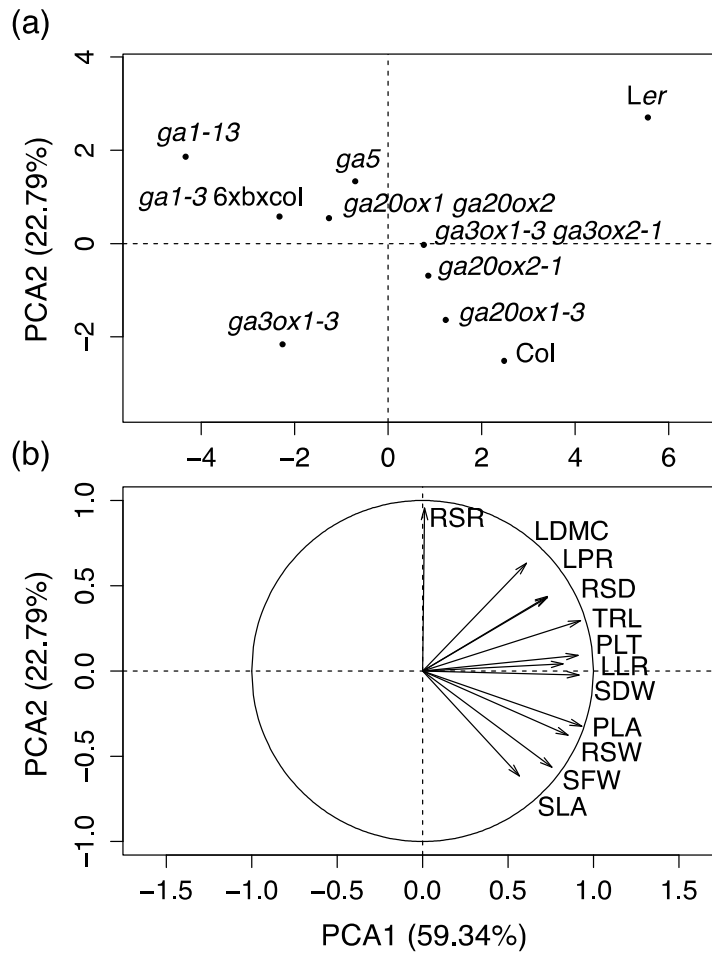

**Fig. S3. Principal Component Analysis (PCA) and correlations for shoot and root related traits.** PCA of 13 *A. thaliana* accessions and the *ga5* mutant (*Ler* background), based on the combined data of different shoot and root phenotypes of plants grown *in vitro* (a; 1% agar with 1/3 Hoagland solution, evaluated 18 days after germination). Variables factor map (b) are shown. Accessions connected by dotted lines indicate genetically related pairs, e.g. *ga5* vs *Ler* (*GA5*). The symbol ⊙ indicates semi-dwarf accessions.

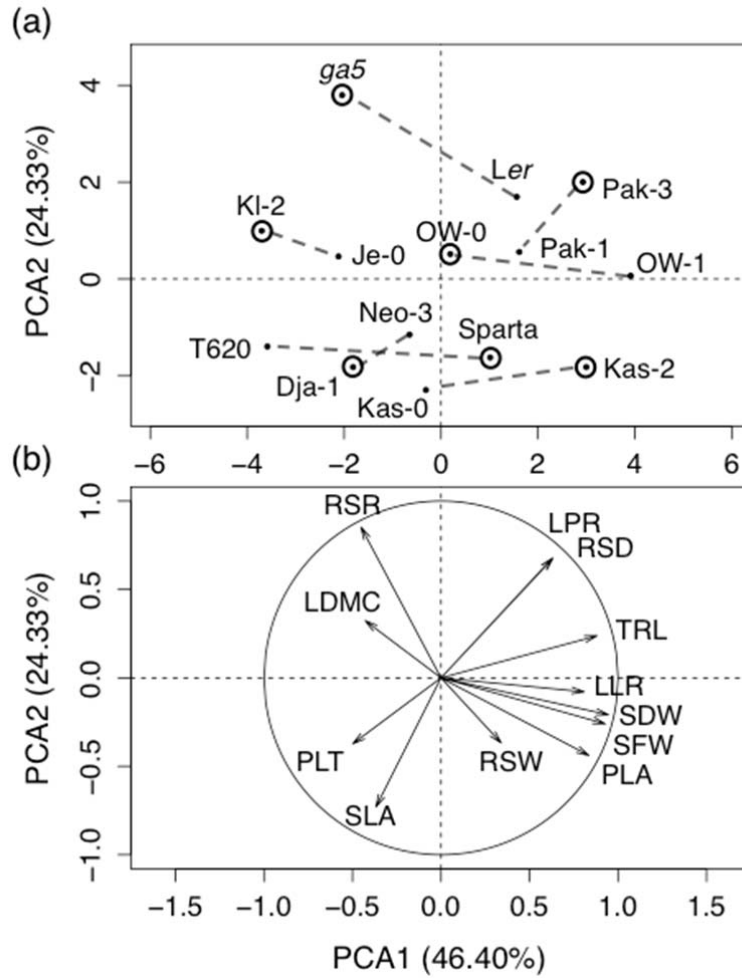

**Fig. S4. Frequency distribution for shoot fresh weight (SFW) and root system depth (RSD) in the *Ler* × *Kas-2* mapping population grown *in vitro*.** The SFW (a) and RSD (b) were evaluated in 125 recombinant inbred lines (RILs); six seedlings were sown per genotype. The medium contained: 0.8% Agar, 1/2 MS, pH 5.8. The experiment was evaluated 21 days after germination. The horizontal black bars denote the phenotype of the parental lines and two additional genotypes (mean values ± standard error).

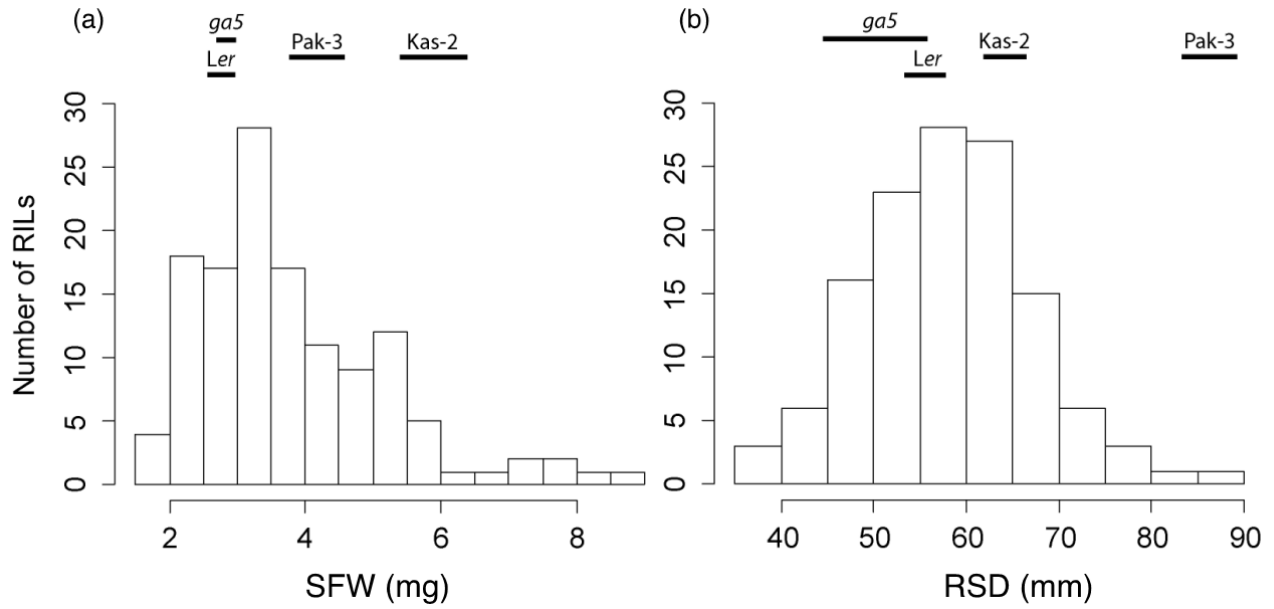

**Fig. S5.** Mean values of shoot fresh weight (SFW) and root system depth (RSD) in the *Ler* × *Kas-2* mapping population sorted by the parental alleles using the markers *ERECTA*, *GA5* and *SNP304*. The phenotypes were evaluated in 125 recombinant inbred lines; six seedlings were sown per genotype. Means ± standard errors are shown.

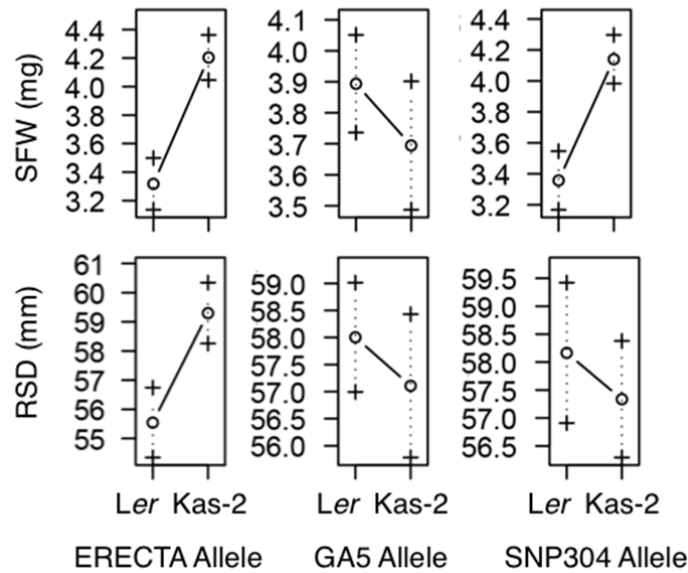

**Fig. S6.** QTL maps for shoot fresh weight (SFW) and root system depth (RSD) in the *Ler* × *Kas-2* mapping population grown *in vitro*. The phenotypes were evaluated in 125 recombinant inbred lines; six seedlings were sown per genotype. The medium contained: 0.8% Agar, 1/2 MS, pH 5.8. The experiment was evaluated 21 days after germination. The horizontal dotted line shows the significance threshold by running 1000 permutations. Position of the *GA5* marker is indicated with an arrow.

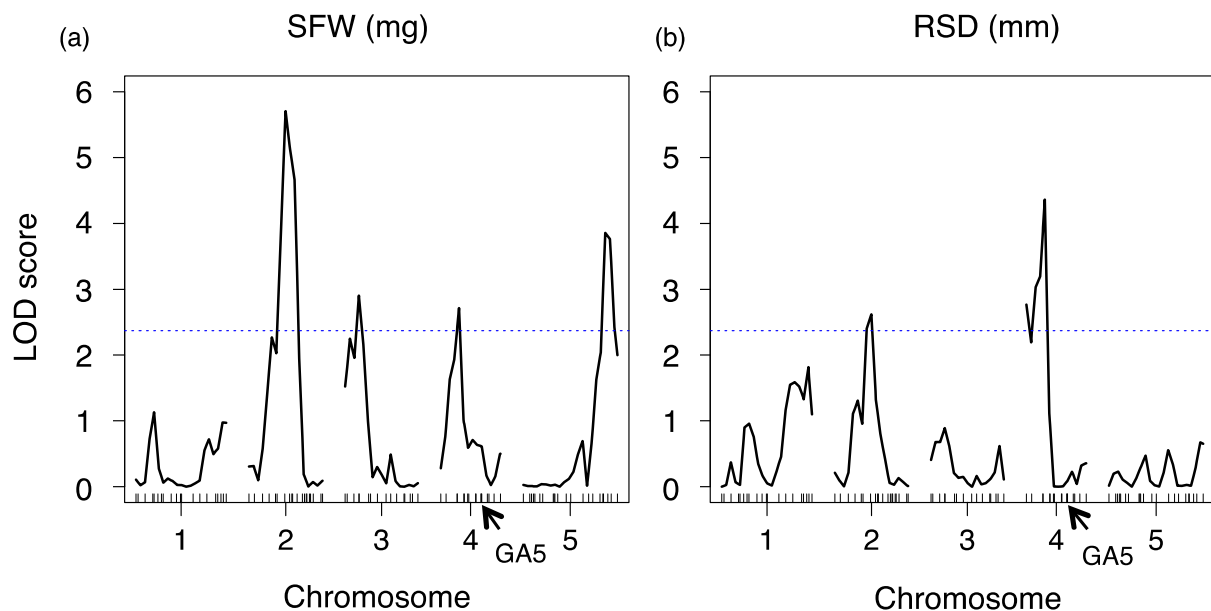

**Fig. S7. Long Pak-3 root system depth occurs independently from the *ga5* inactive allele.** Correlations between plant height (scored two weeks after flowering in greenhouse conditions) and root system depth (RSD, scored 28 days after sowing *in vitro*, medium 0.8% Agar, 1/2 MS, pH 5.8) in different F2 populations (+, *Ler* × Pak-3  $n = 270$ , *ga5* × Pak-3  $n = 250$ ), *Ler* (filled square,  $n = 22$ ), *ga5* (filled triangle,  $n = 17$ ), and Pak-3 (filled circle,  $n = 20$ ).

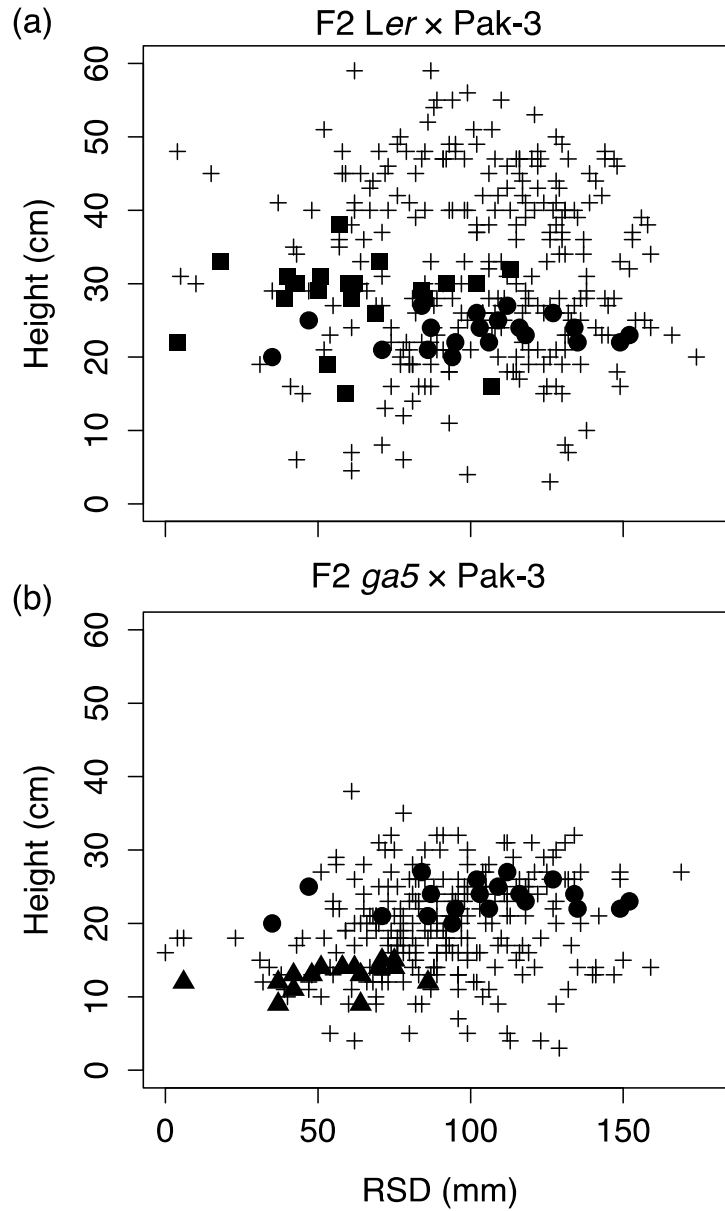

**Fig. S8. Osmotic stress response (growth percentage under sorbitol relative to control) among *A. thaliana* accessions.** a) Growth percentages for shoot fresh weight (SFW) and b) root system depth (RSD) representing variation among genotypes. Seedlings were grown *in vitro* (1% Agar with 1/3 Hoagland, evaluated 18 days after germination). Growth percentages were obtained using mean values (sorbitol/control)  $\pm$  propagation of uncertainties ( $n = 3 - 11$  for sorbitol,  $n = 6 - 12$  for control). Vertical dotted lines separate semi-near isogenic comparisons. The symbol  $\odot$  indicates semi-dwarf accessions.

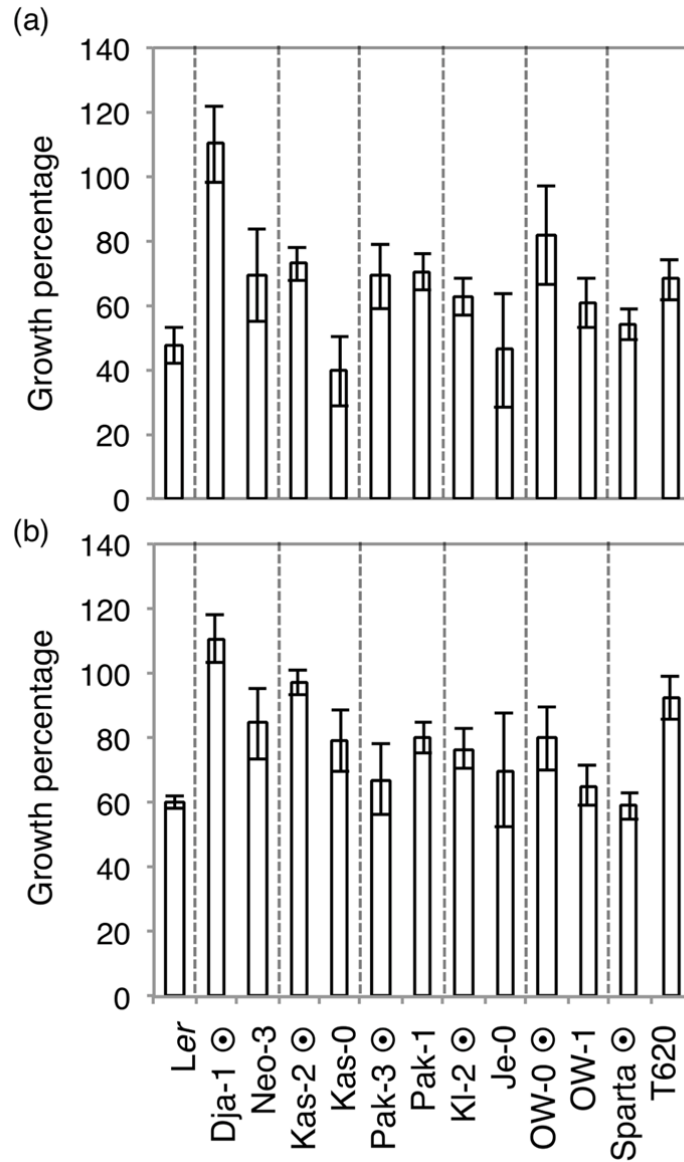

Supplement: supp_mcv099_aob-15208-s01.pdf [file supp_mcv099_aob-15208-s01.pdf]
